# Supplementary material
Source: PubMed Central journal article supplement (PMC2268545)
Supplement: pnas_0712245105_1.pdf [file pnas_0712245105_1.pdf]

|             |     |                                                                  |     |
|-------------|-----|------------------------------------------------------------------|-----|
| mLPCAT3.seq | 1   | MASTADGMGETLEQMRGLWPGVEDLSLNKLATSLGASEQALRLTFSTFLGYPLALFYRH      | 60  |
| mLPCAT4.seq | 1   | -----MATTSTTGSTLLQPLSNAVQLPIDQVNFVVCQLFALLAAVWFRF                | 44  |
| mLPEAT1.seq | 1   | -----MAARPASLSYRTTGSTCLHPLSQLGLPILDQVNFVACQLFALSAAFVFRF          | 51  |
|             |     | .....*.*.....*                                                   |     |
| mLPCAT3.seq | 60  | YLFY--KDSYLHFLHFTFTGLSIAYFNFGHGFYHSLLCVVLQFLTLRLMGRVTVAVITTL     | 118 |
| mLPCAT4.seq | 44  | YVHSSKTSSFIRHVVATLLGLYLAFPCFGWYALHFLVQSGISYICIMIIAGVESMQCCFV     | 104 |
| mLPEAT1.seq | 51  | YLHPGKASPEVRHTLATILGTYFVVFVFCGWYAVHLFVLVLMCYGVMMVTASVSNIHRSYFF   | 111 |
|             |     | **.....*.*.*.*.*.*.*.*.*.*.....*                                 |     |
| mLPCAT3.seq | 118 | CFQMayL----LAGYYTATGDYD[LKWTMPHCVLTlKlTGLCl]DYDYG--GKDGNSLTSEQ   | 173 |
| mLPCAT4.seq | 104 | -FALGLSVCQITRVYIFDYDGYQASDFSGPMMIITQKITSLAYEIHDMGRKDEELTPSQ      | 163 |
| mLPEAT1.seq | 111 | -VAMGYLTICHISR[YTFHYGILTDFSGPLMIVT]KITTLAFQVHDGLGRKAEDLSAEQ      | 170 |
|             |     | .....**.....*.*.*.*.*.*.*.*.*.*.....*                            |     |
| mLPCAT3.seq | 173 | QKYAIRGVPSSLLEVAGFSYFYGAFLVGPQFSMNHMYMKLVRGQ-----LTDIPG          | 221 |
| mLPCAT4.seq | 163 | RGLAVRRMPSLLEYVSYTCNFMGILAGLPCSYKYDIAFIEGRASHVAQPSEN--GKDEQHG    | 222 |
| mLPEAT1.seq | 170 | HRLAVKAP[PSLCELYSLYHLNFMVSIAG]GPCNNFKDYVAFIEGRHIHMKLLEVNWTQRGFQS | 230 |
|             |     | *.....*****.....*.*.*.*.*.*.*.*.....*                            |     |
| mLPCAT3.seq | 221 | KM--PNSTIPALKRSL[GLVYLVGyTLLSPHITD]DYLLTEDYDNRPFWF--RCMYMLIWGKF  | 279 |
| mLPCAT4.seq | 222 | KADPSNAAVEKELLVCGLSLFLHFLTISNMLPVEYNIDEHFQATASWPTKATYLYVSLLA     | 282 |
| mLPEAT1.seq | 230 | LPEPSPMGAVIQKL[CVTLMSLLFLTLKSFPVTF]LDDVFWHKANFLSRLWLYVVMQA       | 290 |
|             |     | *.....*.*.*.*.*.*.*.*.....*                                      |     |
| mLPCAT3.seq | 279 | VLYK[YVTCWLVTEGVCTLSGLGF]NGFDENGTVRWDACANMKVWLFETTPRFN[ITASENI]  | 339 |
| mLPCAT4.seq | 282 | ARPKYYFAWTLADAINNAAGFGFRGYDKNGVARWDLISNLRIQQIEMSTFKMFLDNWNI      | 342 |
| mLPEAT1.seq | 290 | AKPKY[FAWTLADAVHNAAGFGFN]GMDTDGKSRWDLISNLRNIWKIETATSFKMYLENWNI   | 350 |
|             |     | *.*.*.*.....*.*.*.*.*.*.*.*.*.*.....*                            |     |
| mLPCAT3.seq | 339 | [NTNAWVARYIF]KRLKFLGNKELSQL[SLFLALWHGLHSGYLICF]QMEFLIVIVEKQVSS   | 399 |
| mLPCAT4.seq | 342 | QTALWLKRCYERATF----SPTIQTFFLSAIWH[GVYPGYLTFLTGLVMT]AARAVRN       | 397 |
| mLPEAT1.seq | 350 | QTSTWLKVCYERVPW----YPTV[VLTFLLSALWHGVYPGYFTLGTVP]VTLAARAVRN      | 405 |
|             |     | *.*.*.*.....*.*.*.*.*.*.*.*.*.*.....*                            |     |
| mLPCAT3.seq | 399 | LIRDS[PALSSLASITALQPFYYLV]QTIHFWLFGYSMTAFCLFTWDKWLKVYRS[CYFLGH]  | 459 |
| mLPCAT4.seq | 397 | NFRH----YFLEPPQLKLFYD[LITWVATQITISYTVVVPFVLLSIR]PSFTFYSSWYCYLH   | 452 |
| mLPEAT1.seq | 405 | NYRH----HFLSSKARKIAYD[VVTWAVTQLAVSYTAAPFVMLAV]EPTISLYK[SVFFFLH]  | 460 |
|             |     | *.*.....*.*.*.*.*.*.*.*.....*                                    |     |
| mLPCAT3.seq | 459 | [VFFLSLLETLPIY]HKAMVPRKEKLRKRE-----                              | 487 |
| mLPCAT4.seq | 452 | VCSILVLLLLPVK--KSQRRTSTQENVHL[SAQAKKFDERDNPLGQNSFSSTMMNVCNQNRDT  | 510 |
| mLPEAT1.seq | 460 | [ITCLLITLFLPI]KPHQPQRQSRSPNSVKKKAD-----                          | 492 |
|             |     | *.....**.....*                                                   |     |
| mLPCAT3.seq | 487 | -----                                                            | 487 |
| mLPCAT4.seq | 510 | GSRHSSLTQ                                                        | 519 |
| mLPEAT1.seq | 492 | -----                                                            | 492 |
