# Supplementary material
Source: PubMed Central journal article supplement (PMC2268545)
Supplement: pnas_0712245105_9.pdf [file pnas_0712245105_9.pdf]

**Table 2. The  $K_m$  and  $V_{max}$  values of three acyltransferases for each substrate**

| Enzyme  | Enzymatic activity | Substrate       | Acyl-CoA              |                         |                 | Lysophospholipid      |                         |                 |
|---------|--------------------|-----------------|-----------------------|-------------------------|-----------------|-----------------------|-------------------------|-----------------|
|         |                    |                 | $K_m$ , $\mu\text{M}$ | $V_{max}$ , nmol/min/mg | $K_m / V_{max}$ | $K_m$ , $\mu\text{M}$ | $V_{max}$ , nmol/min/mg | $K_m / V_{max}$ |
| mLPCAT3 | LPCAT              | 16:0LPC/20:4CoA | 6.1 - 9.5             | 914 - 978               | 102.9 - 149.9   | 33.8 - 35.2           | 1098 - 1352             | 32.5 - 38.4     |
|         | LPEAT              | 18:1LPE/20:4CoA | 43.2 - 45.0           | 475 - 491               | 10.9 - 11.0     | 27.5 - 31.9           | 273 - 318               | 9.9 - 10.0      |
|         | LPSAT              | 18:1LPS/20:4CoA | 23.2 - 32.8           | 275 - 318               | 9.7 - 11.9      | 17.0 - 27.6           | 350 - 400               | 14.5 - 20.6     |
| mLPCAT4 | LPCAT              | 16:0LPC/18:1CoA | 4.1 - 6.5             | 17.8 - 30.0             | 4.3 - 4.6       | 6.9 - 8.9             | 20.8 - 28.4             | 3.0 - 3.2       |
|         | LPEAT              | 16:0LPE/18:1CoA | 47.3 - 49.0           | 32.5 - 42.8             | 0.7 - 0.9       | 17.5 - 37.9           | 9.7 - 20.2              | 0.5 - 0.5       |
| mLPEAT1 | LPEAT              | 18:1LPE/18:1CoA | 3.3 - 6.1             | 8.7 - 13.1              | 2.1 - 2.6       | 7.2 - 8.3             | 6.6 - 8.1               | 0.9 - 1.0       |
|         | LPSAT              | 18:1LPS/18:1CoA | 3.2 - 4.6             | 3.4 - 5.1               | 0.7 - 1.6       | 1.8 - 2.7             | 4.5 - 5.8               | 2.1 - 2.5       |
