# Supplementary material
Source: PubMed Central journal article supplement (PMC2268545)
Supplement: pnas_0712245105_10.pdf [file pnas_0712245105_10.pdf]

### Table 3. Primers used in this study

| Primer name                                               | Sequence (5'-3')                                               | Product size, bp |
|-----------------------------------------------------------|----------------------------------------------------------------|------------------|
| Primers for cDNA cloning of mLPCAT3, mLPCAT4, and mLPEAT1 |                                                                |                  |
| mLPCAT3-1stPCR-F                                          | AATTGGGGGTGAAGCCAC                                             |                  |
| mLPCAT3-1stPCR-R                                          | AGGAGTGCTGTGAGAAGGGA                                           | 1,617            |
| mLPCAT4-1stPCR-F                                          | TAGAACGTAGCTCGGCACAG                                           |                  |
| mLPCAT4-1stPCR-R                                          | AGGCCTCAAGACTGGCTTCT                                           | 1,637            |
| mLPEAT1-1stPCR-F                                          | CGACAGAGCACCTGAAGAT                                            |                  |
| mLPEAT1-1stPCR-R                                          | GTCCCGCAACTCTCTGTTC                                            | 1,542            |
| FLAG-mLPCAT3-2ndPCR-F                                     | CTAGCTAGCCACCATTGGATTACAAGGATGACGATGACAAGGCGTCTACAGCGGACGGGG   |                  |
| FLAG-mLPCAT3-2ndPCR-R                                     | CCGCTCGAGTCAITCCCTCTTTTTTAACTTTTCTTTTCTTGGC                    | 1,529            |
| FLAG-mLPCAT4-2ndPCR-F                                     | CTAGCTAGCCACCATTGGATTACAAGGATGACGATGACAAGGCCACCACCAGCACCACGGGC |                  |
| FLAGmLPCAT4-2ndPCR-R                                      | CCGCTCGAGTCACTGTGTTAGTGACGAGTGTCTGGAGCC                        | 1,621            |
| FLAG-mLPEAT1-2ndPCR-F                                     | CTAGCTAGCCACCATTGGATTACAAGGATGACGATGACAAGGCAGCACGGCCGCCAGCC    |                  |
| FLAG-mLPEAT1-2ndPCR-R                                     | CCGCTCGAGTCACTGTGCCTTCTTCTTTACAGAATTTGGACTCCG                  | 1,546            |
| Primers for quantitative RT-PCR                           |                                                                |                  |
| mLPCAT3-QPCR-F                                            | TCAGGATACCTGATTGCTTCCA                                         |                  |
| mLPCAT3-QPCR-R                                            | GGATGGTCTGTGCACCAAGTAG                                         | 151              |
| mLPCAT4-QPCR-F                                            | TTCGGTTTCAGAGGATACGACAA                                        |                  |
| mLPCAT4-QPCR-R                                            | AATGTCTGGATTGTCGGACTGAA                                        | 188              |
| mLPEAT1-QPCR-F                                            | CTGAAATGTGTGTGCTATGAGCG                                        |                  |
| mLPEAT1-QPCR-R                                            | TGGAAGAGAGGAAGTGGTGTCTG                                        | 178              |
| mβ-actin-QPCR-F                                           | GCTGTGCTATGTTGCTCTAGACTT                                       |                  |
| mβ-actin-QPCR-R                                           | AATTGAATGTAGTTTCATGGATGC                                       | 174              |
