# Supplementary material
Source: PubMed Central journal article supplement (PMC2268545)
Supplement: pnas_0712245105_11.pdf [file pnas_0712245105_11.pdf]

**Table 4. Accession numbers of LPLAT family**

| Family | Acyltransferase  | Accession no. |
|--------|------------------|---------------|
| LPAAT  | GPAT1            | NP_032175     |
|        | GPAT2            | XP_130488     |
|        | GPAT3            | NP_766303     |
|        | LPAAT $\alpha$   | NP_061350     |
|        | LPAAT $\beta$    | NP_080488     |
|        | LPAAT $\gamma$   | NP_443747     |
|        | LPAAT $\delta$   | NP_080920     |
|        | LPAAT $\epsilon$ | NP_081068     |
|        | LPAAT $\zeta$    | NP_061213     |
|        | LPAAT $\eta$     | NP_997089     |
|        | AT Like 1B       | NP_081875     |
|        | LPGAT1           | NP_758470     |
|        | ALCAT            | Q3UN02        |
|        | LPCAT1           | BAE94687      |
|        | LysoPAFAT/LPCAT2 | BAF47695      |
|        | Tafazzin         | NP_852657     |
| DGAT2  | MGAT1            | NP_080989     |
|        | MGAT2            | NP_803231     |
|        | DGAT2            | NP_080660     |
|        | DGAT2Like3       | NP_001074605  |
|        | DGAT2Like4       | NP_808414     |
|        | DGAT2Like6       | CAM19588      |
| MBOAT  | LPCAT3 (MBOAT5)  | NP_660112     |
|        | LPCAT4 (MBOAT2)  | NP_080313     |
|        | LPEAT1 (MBOAT1)  | NP_705774     |
|        | MBOAT4           | XP_134120     |
|        | DGAT1            | NP_034176     |
|        | ACAT1            | NP_033256     |
|        | ACAT2            | NP_666176     |
|        | Porcupine-a      | NP_058609     |
| LRC4   | NP_084210        |               |
