# Supplementary material
Source: PubMed Central journal article supplement (PMC2268545)

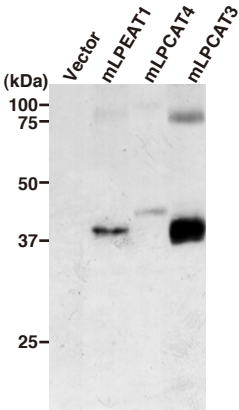

Supplement: pnas_0712245105_2.pdf [file pnas_0712245105_2.pdf]

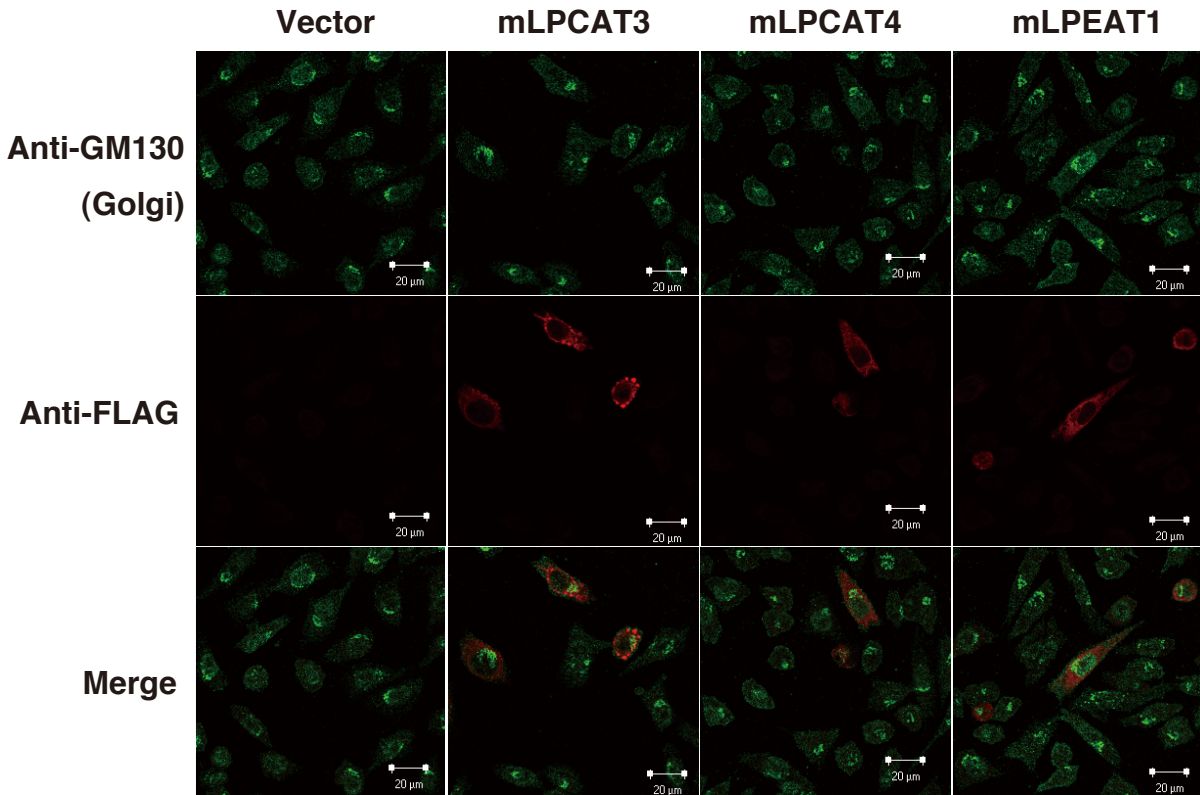

Supplement: pnas_0712245105_3.pdf [file pnas_0712245105_3.pdf]

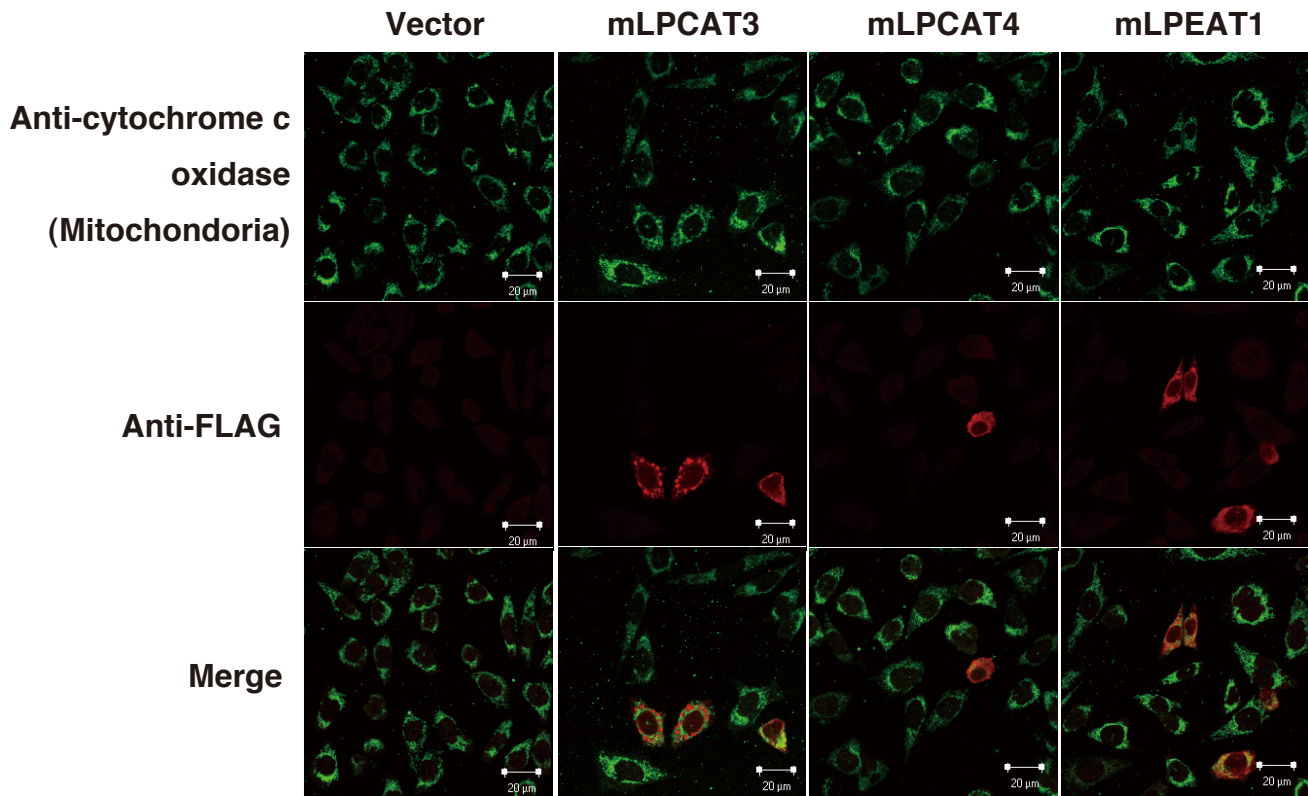

Supplement: pnas_0712245105_4.pdf [file pnas_0712245105_4.pdf]

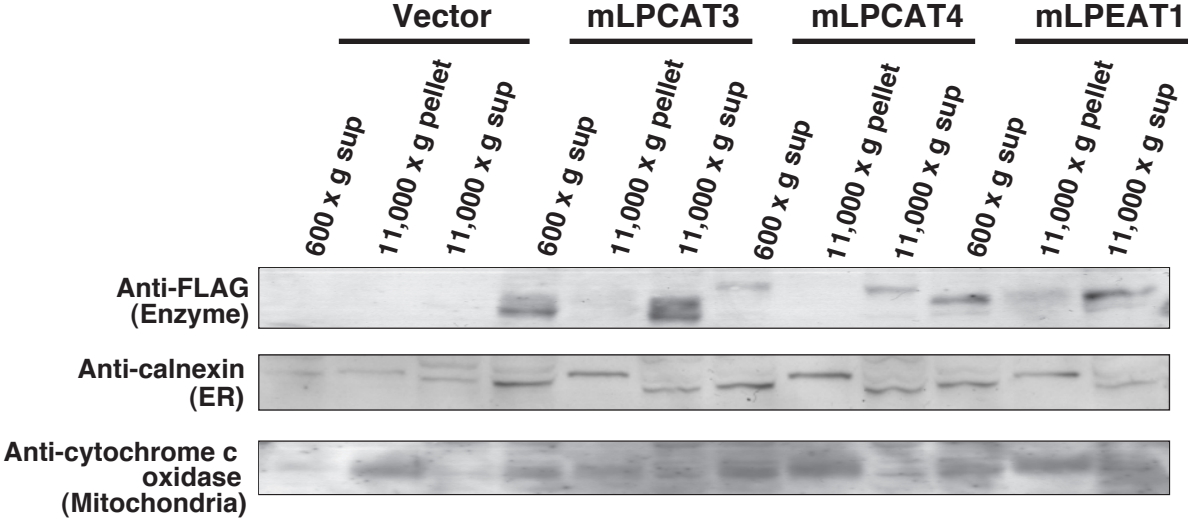

Supplement: pnas_0712245105_5.pdf [file pnas_0712245105_5.pdf]

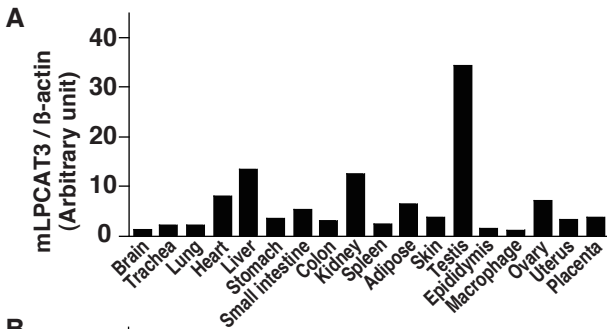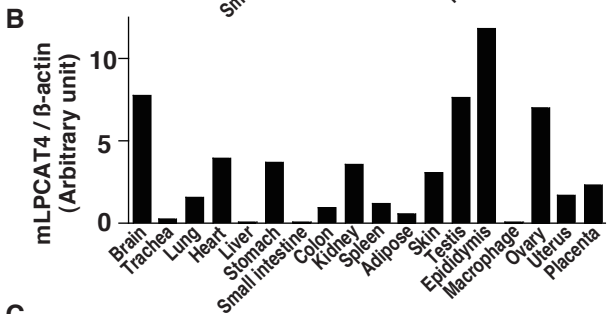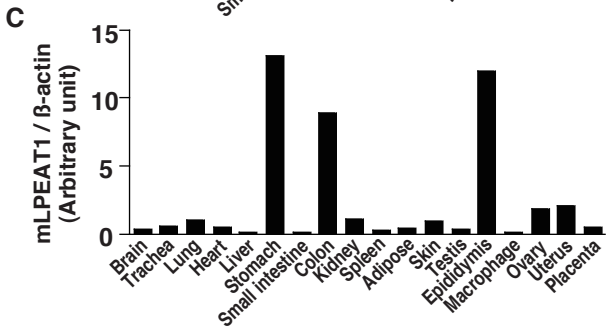

Supplement: pnas_0712245105_6.pdf [file pnas_0712245105_6.pdf]

## mLPCAT3

### A

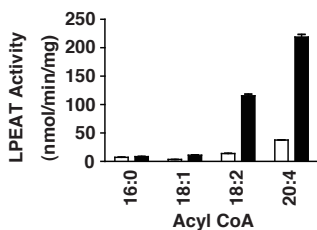

### B

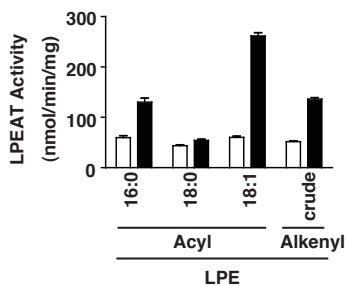

### C

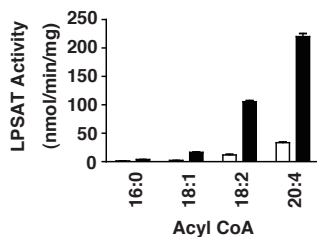

### D

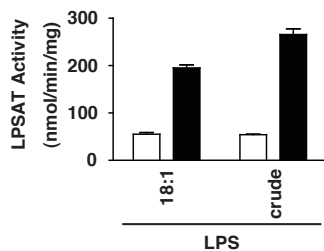

## mLPCAT4

### E

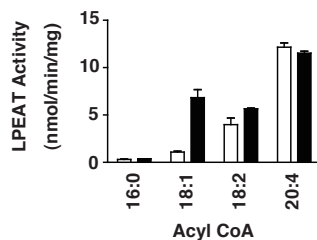

### F

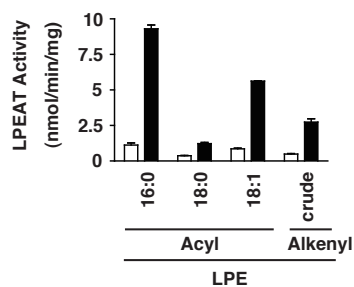

## mLPEAT1

### G

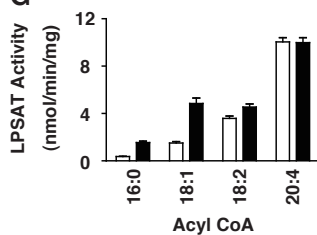

### H

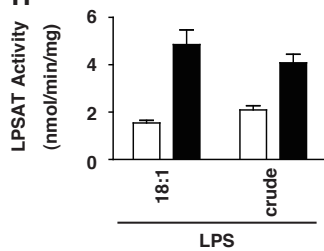

Supplement: pnas_0712245105_7.pdf [file pnas_0712245105_7.pdf]

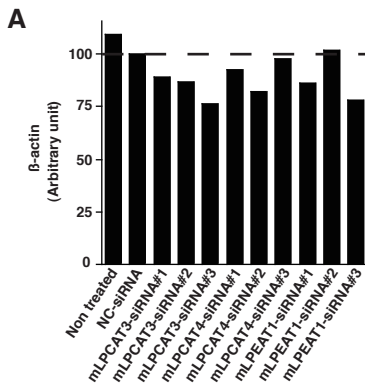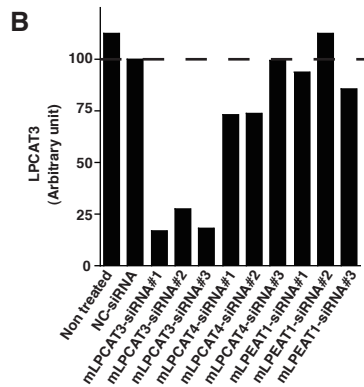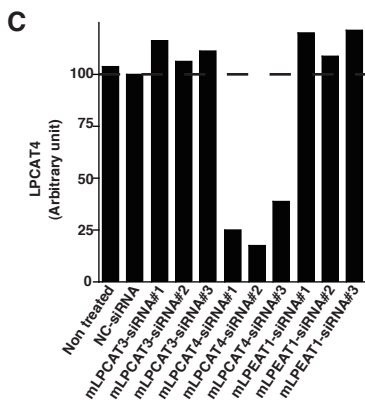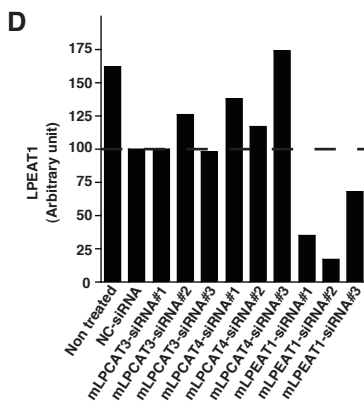

**E**

18:1-CoA (acyl donor)

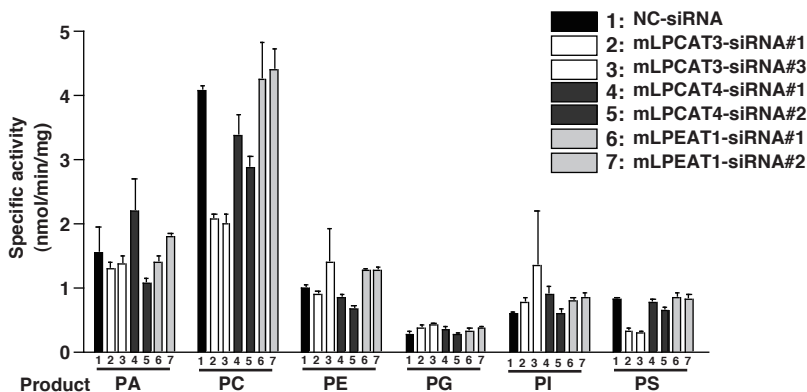

Supplement: pnas_0712245105_8.pdf [file pnas_0712245105_8.pdf]
